# Supplementary material for: Potential Targeted Therapies in Ovarian Cancer
Source: MDPI journal article supplement (doi:10.3390/ph15111324), 2022-10-26

**Table S1. Proportion of classified variant for 128 HGSC patients**

| <b>Clinvar Classification</b>  | <b>Proportion</b> |
|--------------------------------|-------------------|
| Benign                         | 40 (3%)           |
| Benign / Likely Benign         | 67 (5%)           |
| Likely Benign                  | 25 (2%)           |
| VUS                            | 991 (73%)         |
| Likely Pathogenic              | 26 (2%)           |
| Likely pathogenic / Pathogenic | 19 (1%)           |
| Pathogenic                     | 181 (13%)         |

*\*HGSC – High grade serous ovariancancer; VUS – variants of uncertain significance.*

**Table S2. Pathogenic or likely pathogenic mutations per patient (N = 128)**

|               | <b>Number of patients (%)</b> | <b>Number of patients with druggable targets (%)</b> |
|---------------|-------------------------------|------------------------------------------------------|
| None          | 10 (8%)                       | 0                                                    |
| 1 mutation    | 64 (50%)                      | 1 (1%)                                               |
| 2 mutations   | 35 (27%)                      | 18 (14%)                                             |
| 3 mutations   | 12 (9%)                       | 4 (3%)                                               |
| 4 mutations   | 3 (3%)                        | 1 (1%)                                               |
| ≥ 5 mutations | 3 (3%)                        | 3 (2%)                                               |

**Table S3. All pathogenic and likely pathogenic mutations**

**Table S4. Clinical trials evaluating PARP inhibitors in platinum-resistant patients**

| PARP inhibitor | Trial                      | Analysis population                                                                            | No. of patients                                                                      | Results                                                                                                                                                                                                                                                                                                                                                                                                                                                       |
|----------------|----------------------------|------------------------------------------------------------------------------------------------|--------------------------------------------------------------------------------------|---------------------------------------------------------------------------------------------------------------------------------------------------------------------------------------------------------------------------------------------------------------------------------------------------------------------------------------------------------------------------------------------------------------------------------------------------------------|
| Olaparib       | Fong et al., 2010 (24)     | <i>BRCA1/2</i> mutated ovarian cancer                                                          | 50<br>- 13 platinum-sensitive<br>- 24 platinum-resistant<br>- 13 platinum-refractory | RECIST response<br>- 6 (46.2%)<br>- 8 (33.5%)<br>- 0 (0%)                                                                                                                                                                                                                                                                                                                                                                                                     |
| Olaparib       | Kaufmann et al., 2015 (25) | PROC with germline and somatic <i>BRCA</i> mutation                                            | 193 platinum-resistant                                                               | Tumor response rate 31,1 (95% CI, 24,6-38,1)<br>Median PFS 7 months<br>Median OS 16,6 months                                                                                                                                                                                                                                                                                                                                                                  |
| Niraparib      | QUADRA, 2018 (26)          | Relapsed ovarian cancer with PARP-naïve germline or somatic <i>BRCA</i> mutation               | 55<br>- 18 platinum-sensitive<br>- 21 platinum-resistant<br>- 16 platinum-refractory | ORR 39%<br>ORR 33%<br>ORR 19%                                                                                                                                                                                                                                                                                                                                                                                                                                 |
| Olaparib       | BAROCCO, 2019 (27)         | High-grade PROC of whom 86% (109/123) are <i>BRCAwt</i>                                        | 123 platinum-resistant                                                               | Median PFS<br>- Paclitaxel arm 3,1 months<br>- Olaparib-cediranib arm 5,7 months<br>- Cediranib arm 3,8 months<br>HR for PFS in the paclitaxel vs. olaparib-cediranib arm was 0,76 (90% CI: 0,49-1,17).<br><br>Median PFS in the <i>gBRCAwt</i> patients (n=109)<br>- Paclitaxel arm 2,1 months<br>- Olaparib-cediranib arm 5,8 months<br>- Cediranib arm 3,8 months<br>HR for PFS in the paclitaxel vs. olaparib-cediranib arm was 0,63 (95% CI: 0,36-1,10). |
| Rucaparib      | ARIEL4, 2021 (28)          | <i>BRCA1/2</i> mutated high grade recurrent EOC.                                               | 345<br>- 176 platinum-resistant                                                      | Median PFS<br>- Rucaparib arm 7,4 months (95% CI, 7,3-9,1)<br>- Chemotherapy arm 5,7 months (95% CI, 5,5-7,3)<br>HR 0,64 (95% CI, 0,49-0,84)                                                                                                                                                                                                                                                                                                                  |
| Olaparib       | NRG-GY005 (NCT02502266)    | Recurrent platinum-resistant or -refractory HGSC or germline <i>BRCA</i> mutant ovarian cancer | 680                                                                                  | Estimated study completion June 2023.                                                                                                                                                                                                                                                                                                                                                                                                                         |
| Olaparib       | OCTOVA (NCT03117933)       | <i>BRCA1/2</i> mutated PROC                                                                    | 132                                                                                  | Estimated study completion Nov 2021. Results pending.                                                                                                                                                                                                                                                                                                                                                                                                         |

Figure S1. Kaplan-Meier curve for overall survival in patient groups with *BRCA1/2* mutation (upper curve) compared with the *BRCAwt* patients (lower curve).

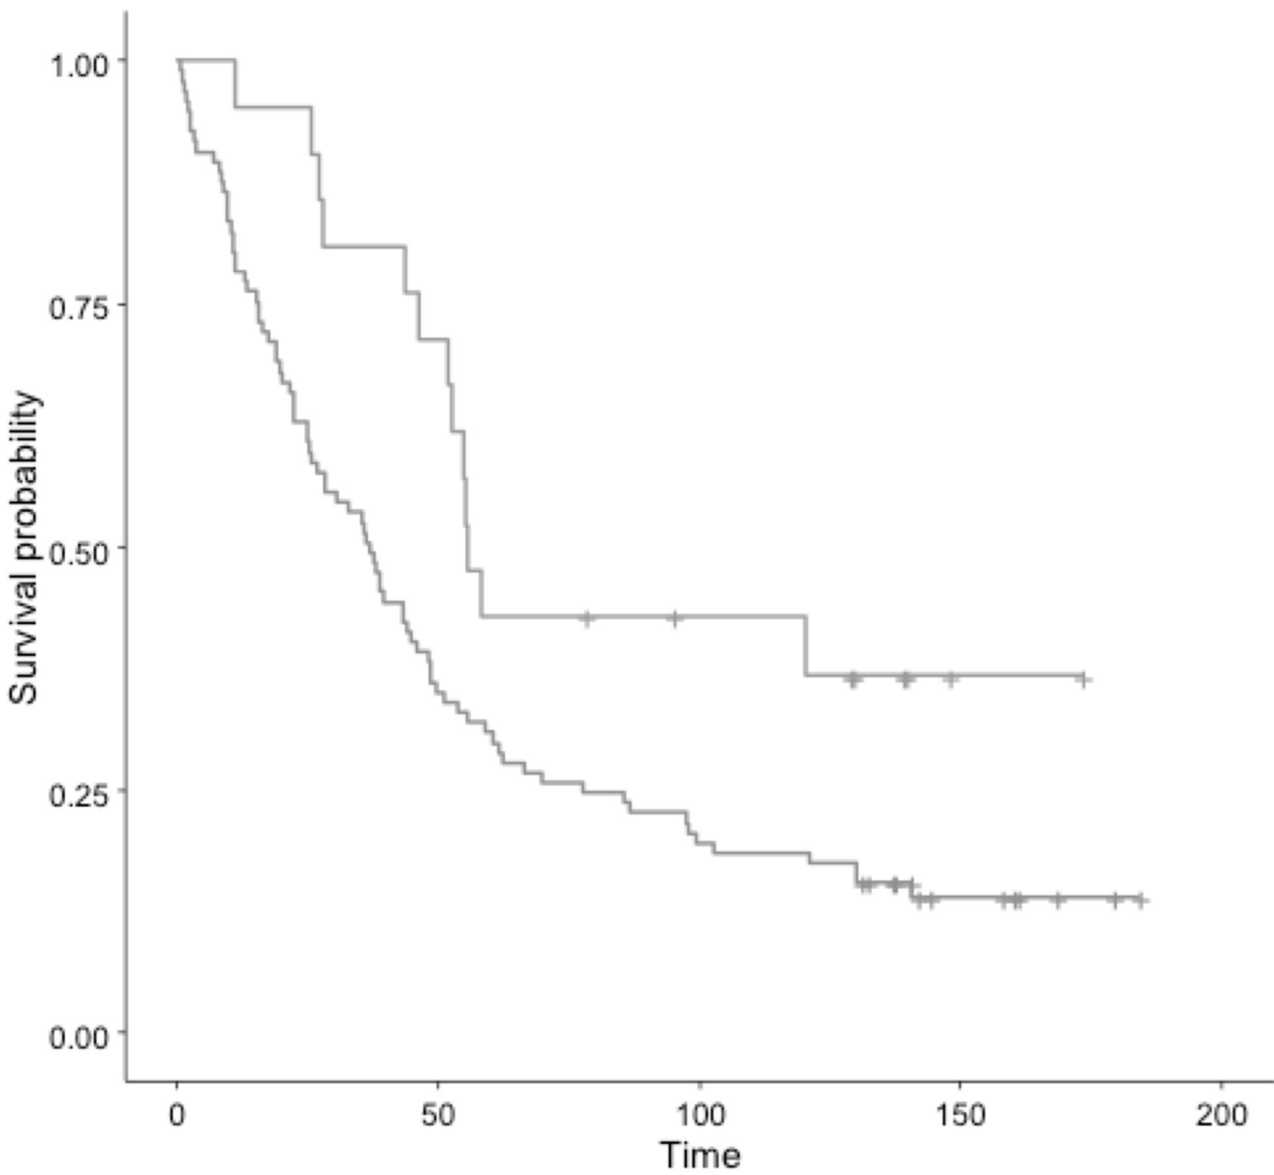

Figure S2. Mutations at the gene level in the groups with druggable targets

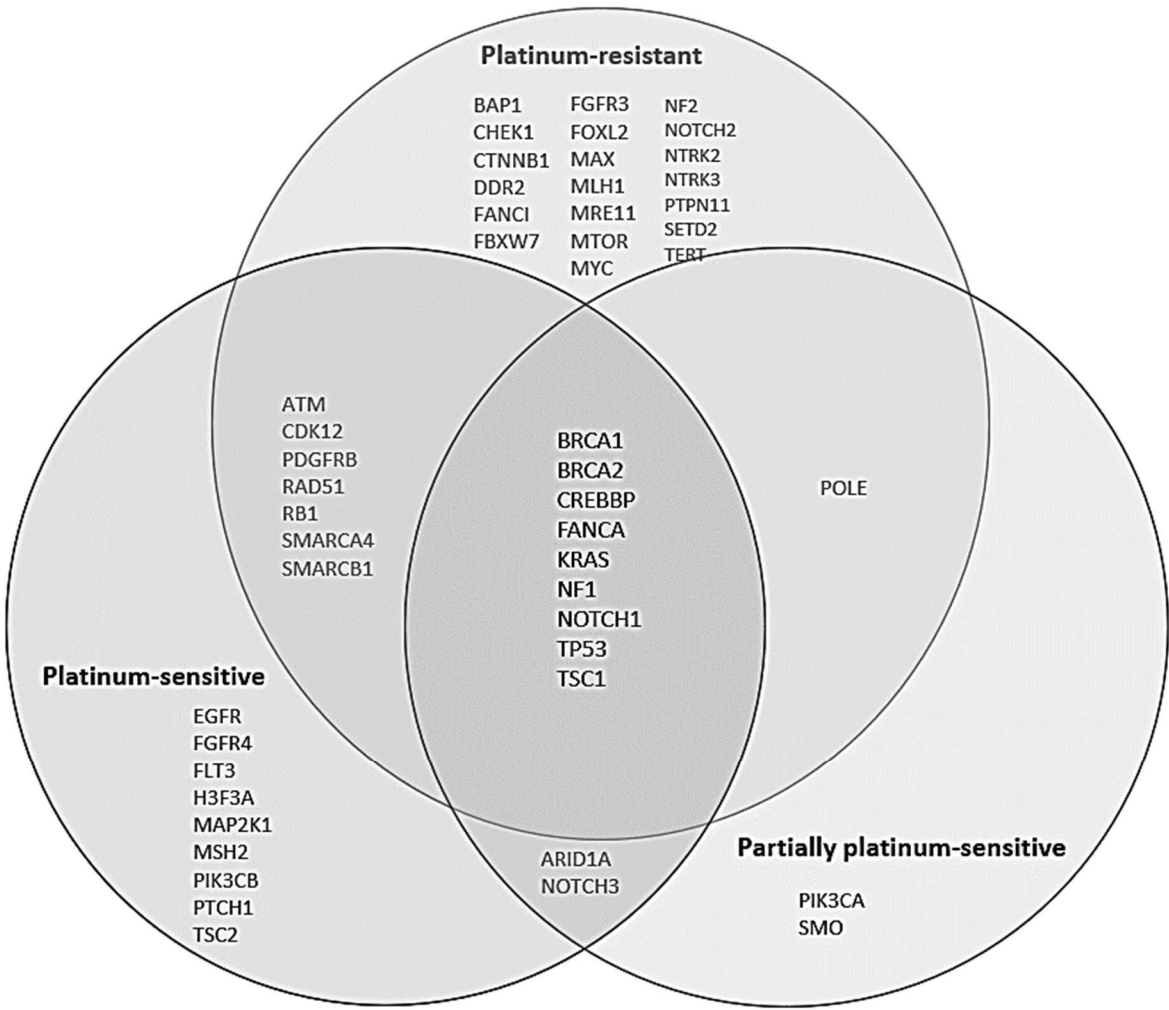

Supplement: s1 [file s1]
