# Supplementary material for: Potential Targeted Therapies in Ovarian Cancer
Source: MDPI journal article supplement (doi:10.3390/ph15111324), 2022-10-26
Supplement: s1 [file s1]

| SampleName | Genes   | Amino Acid Change    | Variant effect              |
|------------|---------|----------------------|-----------------------------|
| 600829     | TP53    | p.Phe338LeufsTer8    | frameshiftDeletion          |
| 600829     | BRCA1   | p.Leu1216PhefsTer2   | frameshiftDeletion          |
| 600830     | TP53    | p.Arg282Trp          | missense                    |
| 600832     | TP53    | p.Ile195SerfsTer52   | frameshiftDeletion          |
| 600832     | NF1     | p.Val1753PhefsTer12  | frameshiftDeletion          |
| 600832     | NF2     | p.Glu106GlyfsTer24   | frameshiftInsertion         |
| 600833     | TP53    | p.Ser303AlafsTer42   | frameshiftDeletion          |
| 600838     | TP53    | p.?                  | splice site                 |
| 600840     | TP53    | p.Tyr220Cys          | missense                    |
| 600844     | MAP2K1  | p.Gln56ArgfsTer8     | frameshiftDeletion          |
| 600844     | TSC2    | p.Glu1476Ter         | nonsense                    |
| 600846     | NOTCH3  | p.Gln1868Ter         | nonsense                    |
| 600846     | SMARCB1 | p.Gln198Ter          | nonsense                    |
| 600847     | MLH1    | p.Arg659Ter          | nonsense                    |
| 600847     | NOTCH1  | p.Gln1282Ter         | nonsense                    |
| 600851     | BRCA2   | p.Lys2909GlnfsTer16  | frameshiftDeletion          |
| 600851     | TP53    | p.Tyr220Cys          | missense                    |
| 600852     | MYC     | p.Gln50Ter           | nonsense                    |
| 600852     | POLE    | p.Gln2217Ter         | nonsense                    |
| 600852     | TP53    | p.Gln144Ter          | nonsense                    |
| 600853     | TP53    | p.Arg213Ter          | nonsense                    |
| 600853     | BRCA1   | p.?                  | splice site                 |
| 600854     | TP53    | p.Glu285Lys          | missense                    |
| 600856     | TP53    | p.?                  | splice site                 |
| 600857     | TP53    | p.Arg248Trp          | missense                    |
| 600859     | CREBBP  | p.Gln2357Ter         | nonsense                    |
| 600859     | TP53    | p.Phe212SerfsTer3    | frameshiftDeletion          |
| 600862     | TP53    | p.Val218GlyfsTer4    | frameshiftInsertion         |
| 600863     | TP53    | p.?                  | splice site                 |
| 600868     | TP53    | p.Arg335SerfsTer9    | frameshiftDeletion          |
| 600870     | TP53    | p.?                  | splice site                 |
| 600870     | BRCA1   | p.Asp1305AlafsTer2   | frameshiftDeletion          |
| 600871     | TP53    | p.Ser241Cys          | missense                    |
| 600871     | NF1     | p.Glu19Ter           | nonsense                    |
| 600873     | NOTCH1  | p.Gln2398AsnfsTer109 | frameshiftBlockSubstitution |
| 600873     | TP53    | p.Ser241Cys          | missense                    |
| 600874     | TSC1    | p.?                  | splice site                 |
| 600874     | CREBBP  | p.Lys2102Ter         | nonsense                    |
| 600874     | TP53    | p.Phe338LeufsTer7    | frameshiftDeletion          |
| 600877     | TP53    | p.Arg337Cys          | missense                    |
| 600882     | TP53    | p.Ile195Thr          | missense                    |
| 600884     | TP53    | p.Arg175His          | missense                    |
| 600885     | FBXW7   | p.Arg479Gln          | missense                    |
| 600885     | TP53    | p.Arg273His          | missense                    |
| 600886     | FGFR4   | p.Trp655Ter          | nonsense                    |
| 600886     | TP53    | p.Arg273Leu          | missense                    |
| 600886     | BRCA1   | p.Arg1699Gln         | missense                    |
| 600887     | TP53    | p.Cys238Trp          | missense                    |
| 600909     | NOTCH1  | p.Leu1481AlafsTer90  | frameshiftDeletion          |

|        |         |                     |                     |
|--------|---------|---------------------|---------------------|
| 600909 | KRAS    | p.Leu168Ter         | nonsense            |
| 600909 | CREBBP  | p.Arg589MetfsTer10  | frameshiftDeletion  |
| 600909 | TP53    | p.?                 | splice site         |
| 600912 | SMO     | p.Gln228Ter         | nonsense            |
| 600912 | TP53    | p.Leu265Pro         | missense            |
| 600913 | TP53    | p.Arg248Gln         | missense            |
| 600917 | TP53    | p.Cys176Tyr         | missense            |
| 600917 | BRCA1   | p.Ala1708Glu        | missense            |
| 600918 | TP53    | p.Glu285Lys         | missense            |
| 600921 | ATM     | p.Glu1751Ter        | nonsense            |
| 600921 | SMARCA4 | p.Gln638Ter         | nonsense            |
| 600926 | TP53    | p.Arg333ValfsTer12  | frameshiftDeletion  |
| 600927 | TP53    | p.Ser215Ile         | missense            |
| 600927 | BRCA1   | p.Glu1046Ter        | nonsense            |
| 600929 | TP53    | p.Tyr234Cys         | missense            |
| 600929 | BRCA1   | p.Gly1738Glu        | missense            |
| 600932 | TP53    | p.Ser241Phe         | missense            |
| 600933 | TP53    | p.Glu56LysfsTer67   | frameshiftDeletion  |
| 600944 | TP53    | p.Ser94Ter          | nonsense            |
| 600956 | TP53    | p.Tyr234Cys         | missense            |
| 600956 | BRCA1   | p.Gln494Ter         | nonsense            |
| 600957 | TP53    | p.His179Gln         | missense            |
| 600957 | CDK12   | p.Ser301CysfsTer5   | frameshiftDeletion  |
| 600962 | NOTCH2  | p.Trp865Ter         | nonsense            |
| 600962 | TSC1    | p.?                 | splice site         |
| 600962 | CHEK1   | p.Gln318Ter         | nonsense            |
| 600962 | NTRK3   | p.Gln159Ter         | nonsense            |
| 600962 | NF2     | p.Phe507ThrfsTer7   | frameshiftDeletion  |
| 600963 | TP53    | p.Val216Met         | missense            |
| 600964 | TP53    | p.Cys141Tyr         | missense            |
| 600967 | TP53    | p.Arg248Gln         | missense            |
| 600968 | TP53    | p.Arg248Gln         | missense            |
| 600970 | TP53    | p.Ser127Phe         | missense            |
| 600971 | TP53    | p.Ser241Phe         | missense            |
| 600973 | TP53    | p.Phe270Ser         | missense            |
| 600973 | BRCA1   | p.Glu1134Ter        | nonsense            |
| 600975 | TP53    | p.Val172LeufsTer2   | frameshiftDeletion  |
| 600975 | BRCA1   | p.Gln1756ProfsTer74 | frameshiftInsertion |
| 600979 | TP53    | p.Glu224Ter         | nonsense            |
| 600979 | BRCA1   | p.?                 | splice site         |
| 600979 | SMARCA4 | p.Glu1113Ter        | nonsense            |
| 600981 | TP53    | p.Leu130SerfsTer40  | frameshiftDeletion  |
| 600982 | KRAS    | p.Gly12Val          | missense            |
| 600982 | TP53    | p.Arg196Ter         | nonsense            |
| 600984 | TP53    | p.Glu286GlyfsTer19  | frameshiftDeletion  |
| 600985 | RB1     | p.?                 | splice site         |
| 600985 | TP53    | p.Thr102AsnfsTer47  | frameshiftInsertion |
| 600989 | TSC1    | p.Lys121Asn         | missense            |
| 600989 | CREBBP  | p.Arg1786His        | missense            |
| 600989 | TP53    | p.Arg290AlafsTer55  | frameshiftDeletion  |

|        |        |                     |                     |
|--------|--------|---------------------|---------------------|
| 600990 | TP53   | p.Met237Ile         | missense            |
| 600991 | BRCA2  | p.Ser2219Ter        | nonsense            |
| 600991 | TP53   | p.Ser261ArgfsTer2   | frameshiftDeletion  |
| 600993 | TP53   | p.Arg273His         | missense            |
| 600994 | TP53   | p.Asp42LysfsTer3    | frameshiftInsertion |
| 600996 | NOTCH1 | p.Gln1282Ter        | nonsense            |
| 600996 | RAD51  | p.Arg194Ter         | nonsense            |
| 600996 | TP53   | p.His168Arg         | missense            |
| 600996 | NF1    | p.Trp696Ter         | nonsense            |
| 600997 | TP53   | p.Asp259Tyr         | missense            |
| 600999 | NF1    | p.?                 | splice site         |
| 600999 | NF1    | p.Trp696Ter         | nonsense            |
| 601000 | TP53   | p.Arg175His         | missense            |
| 601001 | TP53   | p.Arg248Gln         | missense            |
| 601002 | TP53   | p.Arg175His         | missense            |
| 601005 | RB1    | p.Leu550Ter         | nonsense            |
| 601005 | TP53   | p.Arg248Gln         | missense            |
| 601005 | NF1    | p.Leu2669Ter        | nonsense            |
| 601007 | TP53   | p.Arg306Ter         | nonsense            |
| 601009 | TP53   | p.Gln104Ter         | nonsense            |
| 601010 | TP53   | p.His179Arg         | missense            |
| 601010 | NF1    | p.Ser402Ter         | nonsense            |
| 601015 | TP53   | p.Asp228LeufsTer20  | frameshiftInsertion |
| 601015 | BRCA1  | p.Arg1699Gln        | missense            |
| 601017 | TP53   | p.Tyr163Cys         | missense            |
| 601018 | BRCA2  | p.Trp2626Cys        | missense            |
| 601018 | TP53   | p.Val157Phe         | missense            |
| 601021 | BRCA1  | p.Glu23ValfsTer17   | frameshiftDeletion  |
| 601022 | TP53   | p.?                 | splice site         |
| 601118 | TP53   | p.Arg273His         | missense            |
| 601121 | TP53   | p.?                 | splice site         |
| 600776 | TP53   | p.Glu286Ter         | nonsense            |
| 600778 | TP53   | p.Glu224Ter         | nonsense            |
| 600780 | ARID1A | p.Gln1127Ter        | nonsense            |
| 600780 | CREBBP | p.Asn1789ThrfsTer10 | frameshiftDeletion  |
| 600784 | TP53   | p.Asp281Asn         | missense            |
| 600804 | KRAS   | p.Gly12Arg          | missense            |
| 600806 | TP53   | p.Tyr205Cys         | missense            |
| 600809 | PIK3CA | p.Glu542Lys         | missense            |
| 600809 | FANCA  | p.Glu288Ter         | nonsense            |
| 600809 | TP53   | p.?                 | splice site         |
| 600811 | PDGFRB | p.Gln599Ter         | nonsense            |
| 600811 | CDK12  | p.Gln602Ter         | nonsense            |
| 600814 | TP53   | p.Gly279Glu         | missense            |
| 600817 | TP53   | p.Arg342Pro         | missense            |
| 600817 | BRCA1  | p.Gln1756ProfsTer74 | frameshiftInsertion |
| 600818 | TP53   | p.His193Arg         | missense            |
| 600819 | TP53   | p.Arg175His         | missense            |
| 600821 | TP53   | p.Cys141Tyr         | missense            |
| 600821 | NF1    | p.Trp696Ter         | nonsense            |

|        |           |                         |                      |
|--------|-----------|-------------------------|----------------------|
| 600824 | TP53      | p.Gly244Cys             | missense             |
| 600828 | NOTCH1    | p.[Thr2375=;Gln2376Ter] | synonymous, nonsense |
| 600828 | POLE      | p.Trp775Ter             | nonsense             |
| 600828 | TP53      | p.Arg175His             | missense             |
| 600831 | TP53      | p.?                     | splice site          |
| 600837 | BAP1      | p.Arg60Ter              | nonsense             |
| 600837 | TERT      | p.Arg8Ter               | nonsense             |
| 600848 | BRCA2     | p.Ser1741ThrfsTer35     | frameshiftDeletion   |
| 600848 | TP53      | p.Ser149IlefsTer32      | frameshiftInsertion  |
| 600875 | TP53      | p.Val216Met             | missense             |
| 600875 | SMARCB1   | p.Trp321Ter             | nonsense             |
| 600879 | DDR2      | p.Trp132Ter             | nonsense             |
| 600879 | TP53      | p.His179Gln             | missense             |
| 600880 | MTOR      | p.Trp1490Ter            | nonsense             |
| 600880 | NOTCH2,N  | p.Gln143Ter             | nonsense             |
| 600880 | CTNNB1    | p.Trp338Ter             | nonsense             |
| 600880 | SETD2     | p.Gln2362Ter            | nonsense             |
| 600880 | BAP1      | p.Gln277Ter             | nonsense             |
| 600880 | FGFR3     | p.Trp685Ter             | nonsense             |
| 600880 | NTRK2     | p.Gln316Ter             | nonsense             |
| 600880 | TSC1      | p.?                     | splice site          |
| 600880 | PTPN11    | p.Gln506Ter             | nonsense             |
| 600880 | POLE      | p.Trp410Ter             | nonsense             |
| 600880 | BRCA2     | p.Trp3106Ter            | nonsense             |
| 600880 | LOC100506 | p.Arg33Ter              | missense             |
| 600880 | RAD51     | p.Glu259Lys             | missense             |
| 600880 | FANCI     | p.Gln625Ter             | nonsense             |
| 600880 | CREBBP    | p.Gln207Ter             | nonsense             |
| 600880 | FANCA     | p.Trp410Ter             | nonsense             |
| 600880 | TP53      | p.Arg213Gln             | missense             |
| 600880 | NF1       | p.Gln1255Ter            | nonsense             |
| 600881 | FOXL2     | p.Trp98Ter              | nonsense             |
| 600881 | TP53      | p.Leu264TyrfsTer81      | frameshiftDeletion   |
| 600910 | TP53      | p.Tyr220Cys             | missense             |
| 600931 | SLX4      | p.Trp1514Ter            | nonsense             |
| 600931 | TP53      | p.Leu93ArgfsTer30       | frameshiftDeletion   |
| 600935 | ARID1A    | p.Trp1973Ter            | nonsense             |
| 600935 | H3F3A,H3F | p.Gln20Ter              | nonsense             |
| 600935 | MSH2      | p.Gln324Ter             | nonsense             |
| 600935 | MSH2      | p.Trp345Ter             | nonsense             |
| 600935 | MSH2      | p.Gln413Ter             | nonsense             |
| 600935 | PIK3CB    | p.Arg149Ter             | nonsense             |
| 600935 | PDGFRB    | p.Arg987Trp             | missense             |
| 600935 | EGFR      | p.Ala289Thr             | missense             |
| 600935 | PTCH1     | p.Gln1020Ter            | nonsense             |
| 600935 | PTCH1     | p.Gln242Ter             | nonsense             |
| 600935 | NOTCH1    | p.Gln2395Ter            | nonsense             |
| 600935 | ATM       | p.Arg2598Ter            | nonsense             |
| 600935 | FLT3      | p.Asp835Asn             | missense             |
| 600935 | CREBBP    | p.Gln1259Ter            | nonsense             |

|        |           |                     |                          |
|--------|-----------|---------------------|--------------------------|
| 600935 | FANCA,ZNF | p.?, p.?            | splice site, splice site |
| 600935 | TP53      | p.Glu294Ter         | nonsense                 |
| 600935 | BRCA1     | p.?                 | splice site              |
| 600960 | TP53      | p.Gln192Ter         | nonsense                 |
| 601019 | MRE11     | p.Trp210Ter         | nonsense                 |
| 601019 | CREBBP    | p.Arg1103Ter        | nonsense                 |
| 601019 | TP53      | p.?                 | splice site              |
| 600781 | CREBBP    | p.?                 | splice site              |
| 600781 | FANCA     | p.Gln930Ter         | nonsense                 |
| 600781 | TP53      | p.Glu286Lys         | missense                 |
| 600781 | BRCA1     | p.Asn609IlefsTer3   | frameshiftDeletion       |
| 600782 | ARID1A    | p.Gln1499Ter        | nonsense                 |
| 600782 | TP53      | p.His179Gln         | missense                 |
| 600782 | NF1       | p.Glu648Ter         | nonsense                 |
| 600782 | NOTCH3    | p.Glu1572AspfsTer16 | frameshiftInsertion      |
| 600783 | TP53      | p.Arg175His         | missense                 |
| 600813 | TP53      | p.Trp91Ter          | nonsense                 |
| 600822 | TP53      | p.Gly245Cys         | missense                 |
| 600837 | TP53      | p.Pro177Arg         | missense                 |
| 601006 | TP53      | p.Pro153AlafsTer28  | frameshiftInsertion      |
| 600811 | TP53      | p.Pro151Ser         | missense                 |
| 600812 | TP53      | p.Lys132Arg         | missense                 |
| 600827 | TP53      | p.Leu252del         | nonframeshiftDeletion    |
| 600836 | TP53      | p.Met160_Ala161del  | nonframeshiftDeletion    |
| 600876 | TP53      | p.Arg267Pro         | missense                 |
| 600977 | TP53      | p.?                 | splice site              |
| 600823 | TP53      | p.Leu265_Gly266del  | nonframeshiftDeletion    |

| Paste to varsome                               | Pathogenicity |
|------------------------------------------------|---------------|
| chr17-7574011-TCG-T                            | P             |
| chr17-41243899-ATA-A                           | P             |
| chr17-7577094-G-A                              | LP/P          |
| chr17-7578266-TA-T                             | P             |
| chr17-29653253-AC-A                            | P             |
| chr22-30035153-T-TG                            | P             |
| chr17-7577031-TC-T                             | P             |
| chr17-7577156-C-A                              | LP            |
| chr17-7578190-T-C                              | P             |
| chr15-66727447-AC-A                            | P             |
| chr16-2134649-G-T                              | P             |
| chr19-15276663-G-A                             | P             |
| chr22-24145573-C-T                             | P             |
| chr3-37090086-C-T                              | P             |
| chr9-139401225-G-A                             | P             |
| chr13-32950896-GTGAAGAA-G                      | P             |
| chr17-7578190-T-C                              | P             |
| chr8-128750611-C-T                             | P             |
| chr12-133202239-G-A                            | P             |
| chr17-7578500-G-A                              | P             |
| chr17-7578212-G-A                              | P             |
| chr17-41222944-C-T                             | P             |
| chr17-7577085-C-T                              | LP/P          |
| chr17-7574034-C-T                              | P             |
| chr17-7577539-G-A                              | P             |
| chr16-3777979-G-A                              | LP            |
| chr17-7578212-GAA-G                            | P             |
| chr17-7578198-C-CA                             | P             |
| chr17-7576928-T-C                              | LP/P          |
| chr17-7574021-CACGC-C                          | P             |
| chr17-7577496-GACCTG-G                         | LP            |
| chr17-41243633-GT-G                            | P             |
| chr17-7577559-G-C                              | LP            |
| chr17-29422382-G-T                             | P             |
| chr9-139390997-CTG-CATT                        | P             |
| chr17-7577559-G-C                              | LP            |
| chr9-135796749-C-T                             | P             |
| chr16-3778744-T-A                              | P             |
| chr17-7574012-CG-C                             | P             |
| chr17-7574018-G-A                              | LP/P          |
| chr17-7578265-A-G                              | P             |
| chr17-7578406-C-T                              | P             |
| chr4-153247366-C-T                             | LP            |
| chr17-7577120-C-T                              | P             |
| chr5-176523308-G-A                             | P             |
| chr17-7577120-C-A                              | P             |
| chr17-41215947-C-T                             | P             |
| chr17-7577567-A-C                              | P             |
| chr9-139399881-GTTCTTCCAGGGGTCATTGAAGTTGAGGG-G | P             |

|                                      |      |
|--------------------------------------|------|
| chr12-25368442-A-T                   | P    |
| chr16-3830772-TGTTCGTGCCAGCCTTTCCT-T | P    |
| chr17-7577156-C-A                    | LP   |
| chr7-128845188-C-T                   | P    |
| chr17-7577144-A-G                    | LP/P |
| chr17-7577538-C-T                    | P    |
| chr17-7578403-C-T                    | LP/P |
| chr17-41215920-G-T                   | P    |
| chr17-7577085-C-T                    | LP/P |
| chr11-108172448-G-T                  | P    |
| chr19-11113804-C-T                   | P    |
| chr17-7574029-CG-C                   | P    |
| chr17-7578205-C-A                    | P    |
| chr17-41244412-C-A                   | P    |
| chr17-7577580-T-C                    | LP/P |
| chr17-41209133-C-T                   | LP/P |
| chr17-7577559-G-A                    | LP   |
| chr17-7579520-TC-T                   | P    |
| chr17-7579406-G-T                    | P    |
| chr17-7577580-T-C                    | LP/P |
| chr17-41246068-G-A                   | P    |
| chr17-7578393-A-T                    | P    |
| chr17-37619224-ATC-A                 | LP   |
| chr1-120491634-C-T                   | P    |
| chr9-135796749-C-T                   | P    |
| chr11-125514014-C-T                  | P    |
| chr15-88680782-G-A                   | P    |
| chr22-30074252-TGTCT-T               | P    |
| chr17-7578203-C-T                    | LP   |
| chr17-7578508-C-T                    | P    |
| chr17-7577538-C-T                    | P    |
| chr17-7577538-C-T                    | P    |
| chr17-7578550-G-A                    | LP   |
| chr17-7577559-G-A                    | LP   |
| chr17-7577129-A-G                    | LP/P |
| chr17-41244148-C-A                   | P    |
| chr17-7578415-AC-A                   | P    |
| chr17-41209079-T-TG                  | P    |
| chr17-7578179-C-A                    | P    |
| chr17-41215969-C-A                   | P    |
| chr19-11138581-G-T                   | P    |
| chr17-7578541-AG-A                   | P    |
| chr12-25398284-C-A                   | P    |
| chr17-7578263-G-A                    | P    |
| chr17-7577079-CTT-C                  | P    |
| chr13-48941740-G-A                   | LP/P |
| chr17-7579382-G-GT                   | P    |
| chr9-135800974-C-G                   | P    |
| chr16-3779691-C-T                    | LP   |
| chr17-7577069-CG-C                   | P    |

|                       |      |
|-----------------------|------|
| chr17-7577570-C-T     | P    |
| chr13-32915148-C-A    | P    |
| chr17-7577153-CCA-C   | P    |
| chr17-7577120-C-T     | P    |
| chr17-7579563-C-CTT   | P    |
| chr9-139401225-G-A    | P    |
| chr15-41020955-C-T    | P    |
| chr17-7578427-T-C     | P    |
| chr17-29553538-G-A    | P    |
| chr17-7577506-C-A     | LP   |
| chr17-29550461-G-A    | LP   |
| chr17-29553538-G-A    | P    |
| chr17-7578406-C-T     | P    |
| chr17-7577538-C-T     | P    |
| chr17-7578406-C-T     | P    |
| chr13-48955532-TTAG-T | P    |
| chr17-7577538-C-T     | P    |
| chr17-29685533-T-G    | P    |
| chr17-7577022-G-A     | P    |
| chr17-7579377-G-A     | P    |
| chr17-7578394-T-C     | LP   |
| chr17-29528448-C-G    | P    |
| chr17-7577599-C-CAA   | P    |
| chr17-41215947-C-T    | P    |
| chr17-7578442-T-C     | P    |
| chr13-32936732-G-C    | P    |
| chr17-7578461-C-A     | LP   |
| chr17-41276044-ACT-A  | P    |
| chr17-7577610-T-G     | LP   |
| chr17-7577120-C-T     | P    |
| chr17-7576852-C-T     | P    |
| chr17-7577082-C-CA    | P    |
| chr17-7578179-C-A     | P    |
| chr1-27097790-C-T     | P    |
| chr16-3779683-TG-T    | P    |
| chr17-7577097-C-T     | P    |
| chr12-25398285-C-G    | P    |
| chr17-7578235-T-C     | LP   |
| chr3-178936082-G-A    | LP/P |
| chr16-89865605-C-A    | P    |
| chr17-7577610-T-C     | P    |
| chr5-149505020-G-A    | P    |
| chr17-37627889-C-T    | LP   |
| chr17-7577102-C-T     | LP/P |
| chr17-7574002-C-G     | LP/P |
| chr17-41209079-T-TG   | P    |
| chr17-7578271-T-C     | LP/P |
| chr17-7578406-C-T     | P    |
| chr17-7578508-C-T     | P    |
| chr17-29553538-G-A    | P    |



|                        |      |
|------------------------|------|
| chr17-7577551-C-A      | LP   |
| chr9-139391065-GG-AA   | P    |
| chr12-133242032-C-T    | P    |
| chr17-7578406-C-T      | P    |
| chr17-7578555-C-T      | LP/P |
| chr3-52442567-G-A      | P    |
| chr5-1295083-G-A       | P    |
| chr13-32913710-TTAAG-T | P    |
| chr17-7578485-A-AT     | P    |
| chr17-7578203-C-T      | LP   |
| chr22-24167579-G-A     | P    |
| chr1-162724623-G-A     | P    |
| chr17-7578393-A-T      | P    |
| chr1-11217209-C-T      | P    |
| chr1-120539944-G-A     | P    |
| chr3-41268775-G-A      | P    |
| chr3-47087991-G-A      | P    |
| chr3-52439883-G-A      | P    |
| chr4-1808296-G-A       | P    |
| chr9-87342661-C-T      | P    |
| chr9-135796749-C-T     | P    |
| chr12-112926896-C-T    | P    |
| chr12-133250291-C-T    | P    |
| chr13-32968887-G-A     | P    |
| chr14-65560500-G-A     | P    |
| chr15-41021830-G-A     | LP   |
| chr15-89833495-C-T     | P    |
| chr16-3900477-G-A      | P    |
| chr16-89857940-C-T     | P    |
| chr17-7578211-C-T      | P    |
| chr17-29562683-C-T     | P    |
| chr3-138665271-C-T     | P    |
| chr17-7577147-AG-A     | P    |
| chr17-7578190-T-C      | P    |
| chr16-3639097-C-T      | P    |
| chr17-7579408-CA-C     | P    |
| chr1-27106307-G-A      | P    |
| chr1-226252110-C-T     | P    |
| chr2-47643462-C-T      | P    |
| chr2-47643526-G-A      | P    |
| chr2-47657041-C-T      | P    |
| chr3-138461576-G-A     | LP   |
| chr5-149497359-G-A     | P    |
| chr7-55221821-G-A      | LP   |
| chr9-98220405-G-A      | P    |
| chr9-98244253-G-A      | P    |
| chr9-139391008-G-A     | P    |
| chr11-108203492-C-T    | P    |
| chr13-28592642-C-T     | P    |
| chr16-3801731-G-A      | P    |

|                                              |      |
|----------------------------------------------|------|
| chr16-89805698-C-T                           | P    |
| chr17-7577058-C-A                            | P    |
| chr17-41209153-C-T                           | P    |
| chr17-7578275-G-A                            | P    |
| chr11-94209485-C-T                           | P    |
| chr16-3808917-G-A                            | P    |
| chr17-7576852-C-T                            | P    |
| chr16-3929832-C-T                            | LP   |
| chr16-89828421-G-A                           | P    |
| chr17-7577082-C-T                            | P    |
| chr17-41245721-AT-A                          | P    |
| chr1-27101213-C-T                            | P    |
| chr17-7578393-A-T                            | P    |
| chr17-29552209-G-T                           | P    |
| chr19-15284899-C-CG                          | P    |
| chr17-7578406-C-T                            | P    |
| chr17-7579414-C-T                            | P    |
| chr17-7577548-C-A                            | P    |
| chr17-7578400-G-C                            | LP/P |
| chr17-7578474-C-CG                           | P    |
| chr17-7578479-G-A                            | LP/P |
| chr17-7578535-T-C                            | P    |
| chr17-7577525-GAGG-G                         | P    |
| chr17-7578444-GATGGCC-G                      | P    |
| chr17-7577138-C-G                            | P    |
| chr17-7577599-CAGAGCCAACCTAGGAGATAACACAGGC-C | P    |
| chr17-7577138-CGTCCCA-C                      | P    |
